# Supplementary material for: Promoting vision and hearing aids use in an intensive care unit
Source: PubMed Central journal article supplement — BMJ Qual Improv Rep. 2015 Feb 9;4(1):u206276.w2702. doi: 10.1136/bmjquality.u206276.w2702 (PMC4645874; doi:10.1136/bmjquality.u206276.w2702), 2015-02-09
Supplement: bmjqir-4-u206276-w2702-s1.pdf [file bmjqir-4-u206276-w2702-s1.pdf]

1. Data collection sheet

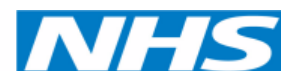

**Survey of visual and hearing impairment in ICU patients**

Survey number: .....

Patient ID: .....

Patient Date of birth: .....

Date survey done: .....

**Visual Impairment:**

|                                                                                                                                                        |  |
|--------------------------------------------------------------------------------------------------------------------------------------------------------|--|
| Does the patient usually use contact lenses to aid his/her daily activities ? (Y/N/ not known)                                                         |  |
| Was the patient questioned about contact lenses on admission to ICU? (Y/N/ patient not able to communicate)                                            |  |
| If not able to communicate, were the patient's NoK asked about contact lenses? (Y/N/NA)                                                                |  |
| If the patient was known to wear contact lenses and was not able to communicate, were they examined for contact lenses? (Y/N/NA)                       |  |
| If it was not known whether the patient was known to wear contact lenses, was the patient examined for contact lenses?                                 |  |
| Are the patient's glasses or contact lenses available to them if extubated? (Y/N/NA)                                                                   |  |
| Does the patient usually use glasses to aid his/her daily activities? (Y/N/ Not known)                                                                 |  |
| Was the patient or their NoK questioned about glasses on admission to ICU? (Y/N/ information not available from patient or NoK)                        |  |
| Was the patient given their glasses if extubated? (Y/N/NA)                                                                                             |  |
| If they do not have their visual aids, why is this-not needed( reading only)/not wanted/not assessed/ family not bring in/ no NOK to bring in/others ? |  |

**Hearing impairment:**

|                                                                                                                                                     |  |
|-----------------------------------------------------------------------------------------------------------------------------------------------------|--|
| Does the patient usually use a hearing aid to support his/her communications? (Y/N/ not known)                                                      |  |
| Was the patient asked whether they use a hearing aid on admission to ICU? (Y/N/ patient not able to communicate)                                    |  |
| If not able to communicate, were the patient's NoK asked whether the patient used a hearing aid? (Y/N/NA)                                           |  |
| Was the patient given their hearing aid when they were extubated?                                                                                   |  |
| If they do not have their hearing aids, why is this-not needed ( in sleep)/not wanted/not assessed/ family not bring in/ no NOK to bring in/others? |  |

Name of person doing survey: .....

Date: .....

## 2. Table summary of raw data

| Baseline Data                         | Original Audit | Re-audit cycle 1 | Re-audit cycle 2   |
|---------------------------------------|----------------|------------------|--------------------|
| Average age (years)                   | 58.38          | 59.90            | 64.45              |
| Glasses wearers (%)                   | 83.33          | 83.72            | 78.30              |
| Average age of glasses wears (years)  | 60.78          | 64.31            | 66.05              |
| Average age of contact Lens wearers   | 60.78          | 87.00            | 50.00              |
| Contact lens wearers (%)              | 6.25           | 2.08             | 2.08               |
| Hearing aids wearers (%)              | 0.00           | 6.37             | 12.50              |
| Sample size (n)                       | 48.00          | 48.00            | 48.00              |
| Enquired about visual impairment (%)  | 0.00           | 81.25            | 100.00             |
| Enquired about hearing Impairment (%) | 0.00           | 81.25            | 100.00             |
| Visual aids available (%)             | 20.00          | 75.00            | 97.42              |
| Reasons for not available             | Not assessed   | Not assessed     | No NOK to bring in |
| Hearing aids available (%)            | N/A            | 100.00           | 100.00             |

### 3. Graphic display of results

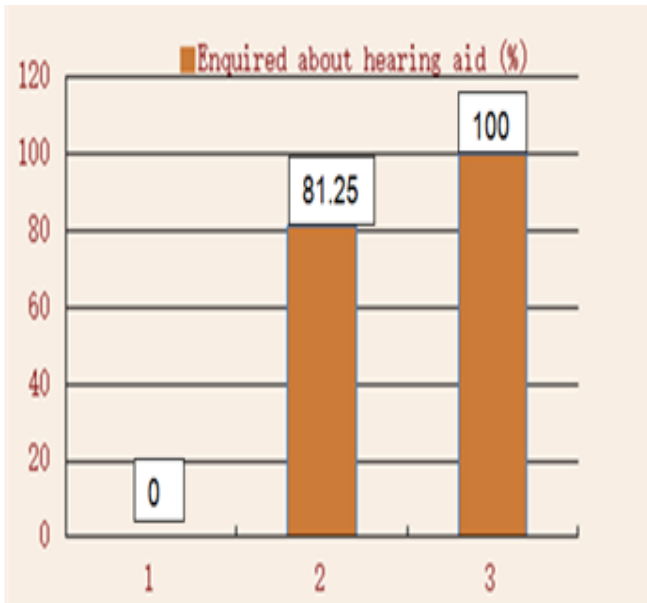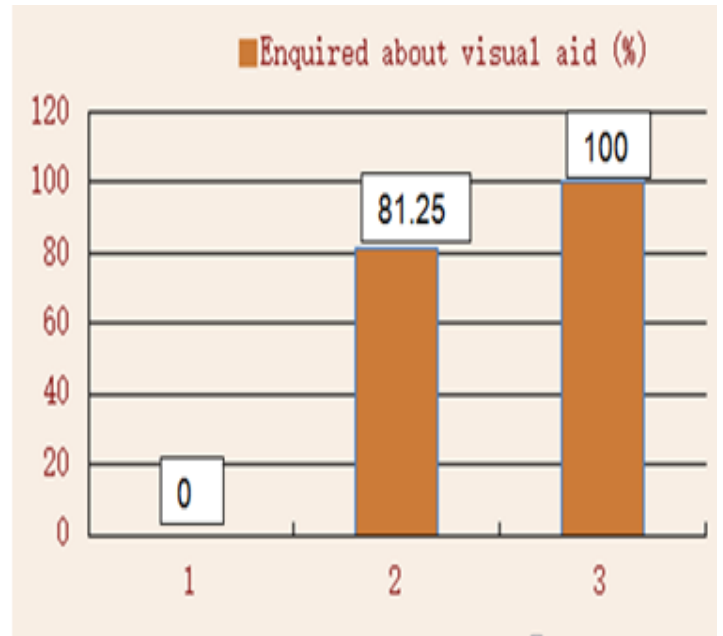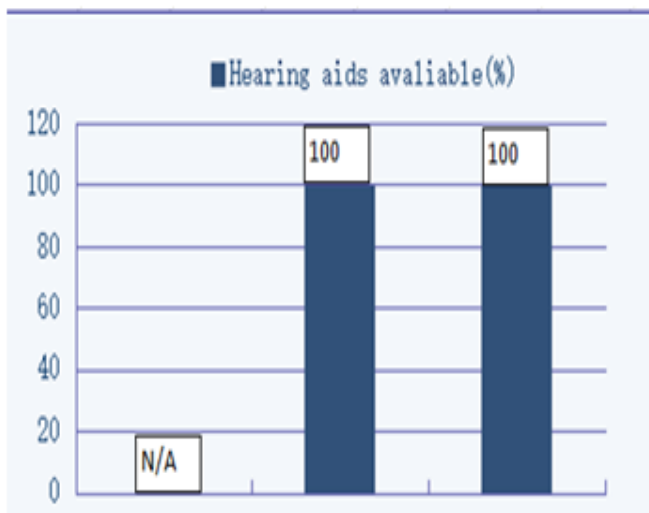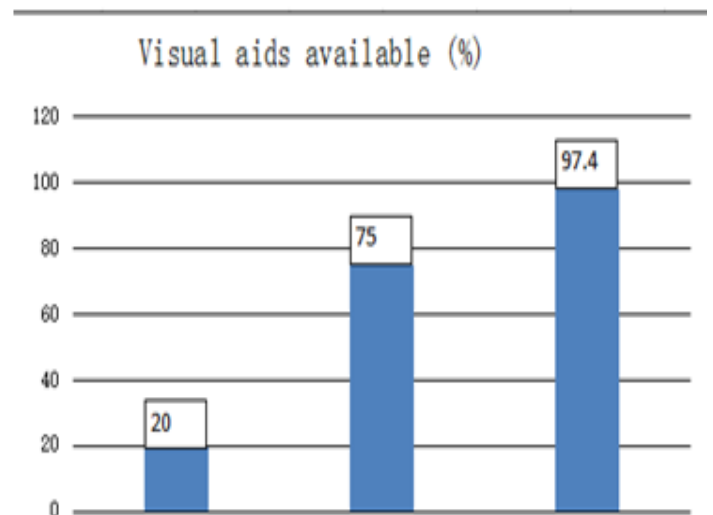

#### 4. Changes made to INNOVIAN after the first audit

| 03-Nov-2014                                                        | 06:00                               | 19:00                               | 04-Nov<br>06:00                     | 18:00                               | 05-Nov<br>06:00:00                  |
|--------------------------------------------------------------------|-------------------------------------|-------------------------------------|-------------------------------------|-------------------------------------|-------------------------------------|
| 12.Psychosocial (Evaluation)                                       |                                     |                                     |                                     |                                     |                                     |
| 12.Psychosocial                                                    |                                     |                                     |                                     |                                     |                                     |
| Method of Communication:                                           | Not Applicable                      |
| Patient Communication                                              |                                     | with                                | with                                |                                     |                                     |
| Next Of Kin Contact:                                               |                                     | Doctor,                             | Doctor,                             |                                     |                                     |
| 'Next of Kin Communication' Note created?                          |                                     | with                                | with                                |                                     |                                     |
| Patient's Mood:                                                    |                                     | Nurse/...                           | Nurse/...                           |                                     |                                     |
| Sleep Behaviour:                                                   | No Visitors                         | Visited Patient                     | No Visitors                         | Visited Patient, Updated...         | No Visitors                         |
| Daily Activities:                                                  | N/A                                 | N/A                                 | N/A                                 | Yes                                 | N/A                                 |
| Audio/Visual Aids used?                                            | Not Applicable                      |
| Patient uses:                                                      | Applicable                          | Applicable                          | Applicable                          | Applicable                          | Applicable                          |
| - Glasses                                                          |                                     |                                     |                                     |                                     |                                     |
| - Hearing Aids                                                     | Not Applicable                      |
| - Other (please state)                                             | N/A                                 | N/A                                 | N/A                                 | N/A                                 | N/A                                 |
| Does the Patient meet the Criteria for Starting a 'Patient Diary'? |                                     |                                     |                                     |                                     |                                     |
| - Yes - Likely to be Sedated/Ventilated for >3 days                | <input type="checkbox"/>            | <input checked="" type="checkbox"/> | <input checked="" type="checkbox"/> | <input type="checkbox"/>            | <input type="checkbox"/>            |
| - Yes - Has been Ventilated/Sedated for >3days                     | <input type="checkbox"/>            | <input checked="" type="checkbox"/> | <input checked="" type="checkbox"/> | <input type="checkbox"/>            | <input type="checkbox"/>            |
| - And Patient's Next of Kin has agreed                             | <input type="checkbox"/>            |
| - Diary already in progress                                        |                                     |                                     |                                     |                                     |                                     |
| - No - Criteria not met                                            | <input checked="" type="checkbox"/> | <input checked="" type="checkbox"/> | <input checked="" type="checkbox"/> | <input checked="" type="checkbox"/> | <input type="checkbox"/>            |
| - Patient Declined                                                 | <input type="checkbox"/>            | <input type="checkbox"/>            | <input type="checkbox"/>            | <input checked="" type="checkbox"/> | <input type="checkbox"/>            |
| - Next of Kin Declined                                             | <input type="checkbox"/>            | <input type="checkbox"/>            | <input type="checkbox"/>            | <input checked="" type="checkbox"/> | <input type="checkbox"/>            |
| Patient Diary Updated:                                             | <input type="checkbox"/>            | <input type="checkbox"/>            | <input type="checkbox"/>            | <input type="checkbox"/>            | <input checked="" type="checkbox"/> |
| Variance/Comments:                                                 | <input type="checkbox"/>            |

## 5. Changes made to INNOVIAN after the second audit

|                                  |                                                                              |
|----------------------------------|------------------------------------------------------------------------------|
| <b>History of Falls</b>          |                                                                              |
| Falls/Dizziness in Past 6 months | <input type="radio"/> No history of falls                                    |
|                                  | <input type="radio"/> Dizziness in the last 6 months                         |
|                                  | <input type="radio"/> Has fallen one or two times before prior to last 48hrs |
|                                  | <input type="radio"/> Has fallen more than twice prior to the last 48 hrs    |
|                                  | <input type="radio"/> Has fallen in the last 48 hrs                          |
| <b>Hearing Deficit</b>           |                                                                              |
| Hearing Deficit                  | <input type="radio"/> None                                                   |
|                                  | <input type="radio"/> Present                                                |
| <b>Visual Impairment</b>         |                                                                              |
| Visual Impairment                | <input type="radio"/> None                                                   |
|                                  | <input type="radio"/> Present                                                |
| <b>Mental State</b>              |                                                                              |
| Mental State                     | <input type="radio"/> Orientated at all times                                |
|                                  | <input type="radio"/> Confused at all times                                  |
|                                  | <input type="radio"/> Intermittently confused                                |
| <b>Relevant Medication</b>       |                                                                              |
| Medication                       | <input type="radio"/> No Medication given                                    |
|                                  | <input type="radio"/> One Medication                                         |
|                                  | <input type="radio"/> Two or more medications                                |
| <b>Elimination</b>               |                                                                              |
| Elimination                      | <input type="radio"/> Independent and continen                               |
|                                  | <input type="radio"/> Catheter or Stoma                                      |
